# Supplementary material for: Prevalence and molecular profiling of Epstein Barr virus (EBV) among healthy blood donors from different nationalities in Qatar
Source: PubMed Central journal article supplement (PMC5724864; doi:10.1371/journal.pone.0189033), 2017-12-11
Supplement: pone.0189033.s001.pdf [file pone.0189033.s001.pdf]

**S1 Table. Donors' data sheet**

| <b>Sample no.</b> | <b>Conc.<br/>ng/<math>\mu</math>l</b> | <b>EBV<br/>Copies/R</b> | <b>EBV<br/>Copies/ng</b> | <b>EBV<br/>Copies/ml</b> | <b>ELISA results</b> | <b>Gen.</b> | <b>Nation.</b> | <b>DOB</b> | <b>Age</b> |
|-------------------|---------------------------------------|-------------------------|--------------------------|--------------------------|----------------------|-------------|----------------|------------|------------|
| <b>1</b>          | 19                                    | 0.0000                  | 0.0000                   | 0.00                     | Past Infection       | M           | EGY            | 1967       | 48         |
| <b>2</b>          | 13                                    | 2.4810                  | 0.0191                   | 248.10                   | Reactive Infection   | M           | EGY            | 1973       | 42         |
| <b>3</b>          | 34.8                                  | 1.4590                  | 0.0042                   | 145.90                   | Past Infection       | M           | PAL            | 1970       | 45         |
| <b>4</b>          | 33.9                                  | 0.0000                  | 0.0000                   | 0.00                     | Past Infection       | M           | PAL            | 1964       | 51         |
| <b>5</b>          | 69.6                                  | 3.0120                  | 0.0043                   | 301.20                   | Past Infection       | M           | IND            | 1980       | 35         |
| <b>6</b>          | 90.6                                  | 0.0000                  | 0.0000                   | 0.00                     | Past Infection       | M           | JOR            | 1975       | 40         |
| <b>7</b>          | 27.6                                  | 0.1830                  | 0.0007                   | 18.30                    | Past Infection       | M           | NEP            | 1986       | 29         |
| <b>8</b>          | 12.2                                  | 0.0000                  | 0.0000                   | 0.00                     | Past Infection       | M           | PHI            | 1975       | 40         |
| <b>9</b>          | 31.8                                  | 27.1390                 | 0.0853                   | 2713.90                  | Past Infection       | M           | IND            | 1984       | 31         |
| <b>10</b>         | 11.1                                  | 11.3500                 | 0.1023                   | 1135.00                  | Past Infection       | M           | YEM            | 1990       | 25         |
| <b>11</b>         | 4.2                                   | 3.1859                  | 0.0759                   | 318.59                   | Past Infection       | M           | PAK            | 1973       | 42         |
| <b>23</b>         | 23                                    | 10.0230                 | 0.0436                   | 1002.30                  | Past Infection       | M           | SYR            | 1982       | 33         |
| <b>24</b>         | 29.4                                  | 0.0000                  | 0.0000                   | 0.00                     | Past Infection       | F           | QAT            | 1994       | 21         |
| <b>25</b>         | 15.8                                  | 1.0603                  | 0.0067                   | 106.03                   | Past Infection       | M           | EGY            | 1979       | 36         |
| <b>26</b>         | 70.9                                  | 47.8940                 | 0.0676                   | 4789.40                  | Past Infection       | M           | SYR            | 1962       | 53         |
| <b>28</b>         | 37.4                                  | 0.0000                  | 0.0000                   | 0.00                     | Past Infection       | M           | SYR            | 1987       | 28         |
| <b>29</b>         | 16.1                                  | 1.9917                  | 0.0124                   | 199.17                   | Reactive Infection   | M           | IND            | 1965       | 50         |
| <b>30</b>         | 29.2                                  | 10.5362                 | 0.0361                   | 1053.62                  | Past Infection       | M           | EGY            | 1987       | 28         |
| <b>31</b>         | 14                                    | 0.0000                  | 0.0000                   | 0.00                     | Past Infection       | M           | PAK            | 1982       | 33         |
| <b>32</b>         | 40.2                                  | 0.0000                  | 0.0000                   | 0.00                     | Past Infection       | M           | SYR            | 1988       | 27         |
| <b>35</b>         | 36.6                                  | 0.0000                  | 0.0000                   | 0.00                     | Past Infection       | M           | YEM            | 1993       | 22         |
| <b>70</b>         | 24                                    | 1.1894                  | 0.0050                   | 118.94                   | Past Infection       | M           | IND            | 1974       | 41         |
| <b>71</b>         | 28.7                                  | 0.0000                  | 0.0000                   | 0.00                     | Past Infection       | M           | IND            | 1990       | 25         |
| <b>72</b>         | 22                                    | 2.7977                  | 0.0127                   | 279.77                   | Past Infection       | M           | PAK            | 1956       | 59         |
| <b>73</b>         | 22.7                                  | 3.6457                  | 0.0161                   | 364.57                   | Past Infection       | M           | EGY            | 1979       | 36         |

|            |       |         |        |         |                    |   |     |      |    |
|------------|-------|---------|--------|---------|--------------------|---|-----|------|----|
| <b>74</b>  | 39.3  | 0.0000  | 0.0000 | 0.00    | Past Infection     | M | JOR | 1981 | 34 |
| <b>75</b>  | 23.8  | 2.9107  | 0.0122 | 291.07  | Reactive Infection | M | QAT | 1970 | 45 |
| <b>76</b>  | 44.2  | 0.0000  | 0.0000 | 0.00    | Past Infection     | M | QAT | 1983 | 32 |
| <b>77</b>  | 48.1  | 1.3321  | 0.0028 | 133.21  | Past Infection     | M | SYR | 1977 | 38 |
| <b>78</b>  | 24.5  | 1.6549  | 0.0068 | 165.49  | Reactive Infection | M | QAT | 1980 | 35 |
| <b>79</b>  | 10.4  | 0.0000  | 0.0000 | 0.00    | Past Infection     | M | SYR | 1979 | 36 |
| <b>80</b>  | 15.4  | 1.0298  | 0.0067 | 102.98  | Reactive Infection | M | SYR | 1982 | 33 |
| <b>81</b>  | 54.1  | 0.0000  | 0.0000 | 0.00    | Past Infection     | M | EGY | 1976 | 39 |
| <b>82</b>  | 17.6  | 0.0000  | 0.0000 | 0.00    | Past Infection     | M | PAK | 1971 | 44 |
| <b>83</b>  | 41.3  | 4.2542  | 0.0103 | 425.42  | Past Infection     | M | JOR | 1977 | 38 |
| <b>84</b>  | 13.1  | 0.0000  | 0.0000 | 0.00    | Past Infection     | M | EGY | 1971 | 44 |
| <b>85</b>  | 31.8  | 1.1010  | 0.0035 | 110.10  | Past Infection     | M | IND | 1975 | 40 |
| <b>86</b>  | 26.4  | 2.7530  | 0.0104 | 275.30  | Past Infection     | M | JOR | 1968 | 47 |
| <b>87</b>  | 6.8   | 0.0000  | 0.0000 | 0.00    | Past Infection     | M | IND | 1982 | 33 |
| <b>88</b>  | 11.2  | 3.4040  | 0.0304 | 340.40  | Past Infection     | M | YEM | 1989 | 26 |
| <b>89</b>  | 6.1   | 0.0000  | 0.0000 | 0.00    | Past Infection     | M | QAT | 1981 | 34 |
| <b>90</b>  | 4.58  | 0.0000  | 0.0000 | 0.00    | Past Infection     | M | QAT | 1987 | 28 |
| <b>91</b>  | 5.4   | 3.7581  | 0.0696 | 375.81  | Past Infection     | M | SYR | 1983 | 32 |
| <b>92</b>  | 8.6   | 0.5000  | 0.0058 | 50.00   | Reactive Infection | F | QAT | 1993 | 22 |
| <b>93</b>  | 11.1  | 1.5550  | 0.0140 | 155.50  | Past Infection     | M | SYR | 1981 | 34 |
| <b>94</b>  | 6.9   | 0.0000  | 0.0000 | 0.00    | Past Infection     | M | SYR | 1984 | 31 |
| <b>95</b>  | 7.5   | 4.9093  | 0.0655 | 490.93  | Past Infection     | M | QAT | 1970 | 45 |
| <b>96</b>  | 9.8   | 3.1268  | 0.0319 | 312.68  | Past Infection     | M | PAK | 1973 | 42 |
| <b>97</b>  | 10.7  | 0.0000  | 0.0000 | 0.00    | Past Infection     | M | JOR | 1978 | 37 |
| <b>98</b>  | 8.6   | 0.0000  | 0.0000 | 0.00    | Past Infection     | M | IND | 1987 | 28 |
| <b>99</b>  | 14.52 | 0.0000  | 0.0000 | 0.00    | Past Infection     | M | SYR | 1985 | 30 |
| <b>100</b> | 32.4  | 10.8917 | 0.0336 | 1089.17 | Past Infection     | M | PAK | 1974 | 41 |
| <b>101</b> | 47.4  | 0.0000  | 0.0000 | 0.00    | Past Infection     | M | YEM | 1990 | 25 |
| <b>102</b> | 81.5  | 8.2259  | 0.0101 | 822.59  | Active Infection   | M | PAK | 1975 | 40 |
| <b>103</b> | 35.5  | 0.0000  | 0.0000 | 0.00    | Past Infection     | M | QAT | 1983 | 32 |

|            |       |          |        |          |                    |   |     |      |    |
|------------|-------|----------|--------|----------|--------------------|---|-----|------|----|
| <b>104</b> | 85.8  | 5.0896   | 0.0059 | 508.96   | Past Infection     | M | LEB | 1992 | 23 |
| <b>105</b> | 65.5  | 22.4172  | 0.0342 | 2241.72  | Past Infection     | M | BAH | 1986 | 29 |
| <b>106</b> | 109   | 130.5692 | 0.1198 | 13056.92 | Past Infection     | M | SYR | 1965 | 50 |
| <b>107</b> | 47.8  | 0.0000   | 0.0000 | 0.00     | Past Infection     | M | QAT | 1976 | 39 |
| <b>108</b> | 59.3  | 0.0000   | 0.0000 | 0.00     | Reactive Infection | M | MOR | 1976 | 39 |
| <b>109</b> | 94.7  | 4.1793   | 0.0044 | 417.93   | Past Infection     | M | QAT | 1961 | 54 |
| <b>110</b> | 106   | 1.1660   | 0.0011 | 116.60   | Reactive Infection | M | BAH | 1967 | 48 |
| <b>111</b> | 28.9  | 0.0000   | 0.0000 | 0.00     | Reactive Infection | M | IND | 1969 | 46 |
| <b>112</b> | 25    | 205.8600 | 0.8234 | 20586.00 | Reactive Infection | M | IND | 1972 | 43 |
| <b>113</b> | 26    | 0.0000   | 0.0000 | 0.00     | Past Infection     | M | EGY | 1988 | 27 |
| <b>114</b> | 20    | 0.0000   | 0.0000 | 0.00     | Past Infection     | M | LEB | 1970 | 45 |
| <b>115</b> | 26    | 3.9007   | 0.0150 | 390.07   | Reactive Infection | M | SYR | 1993 | 22 |
| <b>116</b> | 19.9  | 0.0000   | 0.0000 | 0.00     | Past Infection     | M | IND | 1983 | 32 |
| <b>117</b> | 23    | 8.6039   | 0.0374 | 860.39   | Past Infection     | M | EGY | 1986 | 29 |
| <b>119</b> | 31.5  | 25.1101  | 0.0797 | 2511.01  | Past Infection     | M | JOR | 1989 | 26 |
| <b>120</b> | 40    | 12.8915  | 0.0322 | 1289.15  | Past Infection     | M | JOR | 1974 | 41 |
| <b>121</b> | 41.3  | 32.5428  | 0.0788 | 3254.28  | Past Infection     | M | PAK | 1971 | 44 |
| <b>122</b> | 60    | 8.3663   | 0.0139 | 836.63   | Past Infection     | M | QAT | 1965 | 50 |
| <b>124</b> | 50.9  | 0.0000   | 0.0000 | 0.00     | Past Infection     | M | SYR | 1988 | 27 |
| <b>126</b> | 55    | 0.0000   | 0.0000 | 0.00     | Past Infection     | M | PAL | 1965 | 50 |
| <b>127</b> | 68.1  | 5.0823   | 0.0075 | 508.23   | Past Infection     | M | SUD | 1954 | 61 |
| <b>128</b> | 49.8  | 0.0000   | 0.0000 | 0.00     | Past Infection     | M | SYR | 1981 | 34 |
| <b>129</b> | 40    | 0.0000   | 0.0000 | 0.00     | Past Infection     | M | QAT | 1977 | 38 |
| <b>130</b> | 35    | 0.0000   | 0.0000 | 0.00     | Past Infection     | M | MOR | 1984 | 31 |
| <b>131</b> | 133.4 | 17.5996  | 0.0132 | 1759.96  | Past Infection     | M | SUD | 1986 | 29 |
| <b>133</b> | 58.5  | 0.0000   | 0.0000 | 0.00     | Past Infection     | M | IND | 1989 | 26 |
| <b>134</b> | 66.8  | 0.0000   | 0.0000 | 0.00     | Recent Active      | M | EGY | 1980 | 35 |
| <b>135</b> | 71.1  | 7.9998   | 0.0113 | 799.98   | Past Infection     | M | EGY | 1977 | 38 |
| <b>136</b> | 19.9  | 0.0000   | 0.0000 | 0.00     | Past Infection     | M | SUD | 1988 | 27 |

|            |       |         |        |         |                    |   |     |      |    |
|------------|-------|---------|--------|---------|--------------------|---|-----|------|----|
| <b>137</b> | 32.2  | 0.0000  | 0.0000 | 0.00    | No Infection       | M | SYR | 1986 | 29 |
| <b>138</b> | 32.7  | 17.5773 | 0.0538 | 1757.73 | Past Infection     | M | SUD | 1963 | 52 |
| <b>139</b> | 26.6  | 0.0000  | 0.0000 | 0.00    | Past Infection     | M | QAT | 1982 | 33 |
| <b>140</b> | 24.1  | 16.2835 | 0.0676 | 1628.35 | Past Infection     | M | QAT | 1967 | 48 |
| <b>141</b> | 54.6  | 0.0000  | 0.0000 | 0.00    | Past Infection     | M | PAK | 1993 | 22 |
| <b>142</b> | 32.8  | 0.0000  | 0.0000 | 0.00    | Past Infection     | M | JOR | 1970 | 45 |
| <b>143</b> | 40.2  | 3.5096  | 0.0087 | 350.96  | Past Infection     | M | JOR | 1975 | 40 |
| <b>144</b> | 59    | 0.0000  | 0.0000 | 0.00    | Past Infection     | M | SYR | 1986 | 29 |
| <b>145</b> | 39.3  | 9.0243  | 0.0230 | 902.43  | Past Infection     | M | QAT | 1964 | 51 |
| <b>146</b> | 59.5  | 0.0000  | 0.0000 | 0.00    | Past Infection     | M | SYR | 1976 | 39 |
| <b>147</b> | 49.6  | 0.0000  | 0.0000 | 0.00    | Past Infection     | M | IRN | 1970 | 45 |
| <b>148</b> | 23.4  | 6.0302  | 0.0258 | 603.02  | Past Infection     | M | IND | 1959 | 56 |
| <b>149</b> | 48.9  | 13.6118 | 0.0278 | 1361.18 | Recent Active      | M | SYR | 1985 | 30 |
| <b>150</b> | 42.8  | 3.1285  | 0.0073 | 312.85  | Past Infection     | M | IND | 1968 | 47 |
| <b>151</b> | 55    | 0.0000  | 0.0000 | 0.00    | Past Infection     | M | SYR | 1989 | 26 |
| <b>152</b> | 88.5  | 0.0000  | 0.0000 | 0.00    | Past Infection     | M | JOR | 1965 | 50 |
| <b>153</b> | 582.8 | 5.3296  | 0.0009 | 532.96  | Past Infection     | M | SYR | 1983 | 32 |
| <b>154</b> | 35.8  | 0.0000  | 0.0000 | 0.00    | No Infection       | M | IND | 1983 | 32 |
| <b>155</b> | 36    | 0.0000  | 0.0000 | 0.00    | Past Infection     | M | US  | 1958 | 57 |
| <b>157</b> | 60.4  | 0.0000  | 0.0000 | 0.00    | Reactive Infection | M | PHI | 1969 | 46 |
| <b>158</b> | 46.4  | 2.9478  | 0.0064 | 294.78  | Past Infection     | M | EGY | 1977 | 38 |
| <b>159</b> | 37    | 79.8208 | 0.2157 | 7982.08 | Reactive Infection | M | SYR | 1990 | 25 |
| <b>160</b> | 37.9  | 3.1065  | 0.0082 | 310.65  | Past Infection     | M | YEM | 1973 | 42 |
| <b>161</b> | 23    | 2.4538  | 0.0107 | 245.38  | Past Infection     | M | EGY | 1973 | 42 |
| <b>162</b> | 53    | 7.5193  | 0.0142 | 751.93  | Past Infection     | M | LEB | 1956 | 59 |
| <b>163</b> | 17.5  | 0.0000  | 0.0000 | 0.00    | Past Infection     | M | JOR | 1966 | 49 |
| <b>164</b> | 37.8  | 4.6976  | 0.0124 | 469.76  | Past Infection     | M | EGY | 1985 | 30 |
| <b>165</b> | 49.1  | 4.9651  | 0.0101 | 496.51  | Past Infection     | M | QAT | 1988 | 27 |
| <b>166</b> | 57.2  | 13.6228 | 0.0238 | 1362.28 | Past Infection     | M | PHI | 1974 | 41 |
| <b>167</b> | 47.3  | 60.5734 | 0.1281 | 6057.34 | Past Infection     | M | JOR | 1969 | 46 |

|            |       |         |        |         |                    |   |     |      |    |
|------------|-------|---------|--------|---------|--------------------|---|-----|------|----|
| <b>168</b> | 31.2  | 0.0000  | 0.0000 | 0.00    | Reactive Infection | M | JOR | 1993 | 22 |
| <b>169</b> | 52.9  | 0.0000  | 0.0000 | 0.00    | Past Infection     | M | EGY | 1984 | 31 |
| <b>170</b> | 70.3  | 5.5052  | 0.0078 | 550.52  | Past Infection     | M | PHI | 1988 | 27 |
| <b>171</b> | 46.5  | 0.0000  | 0.0000 | 0.00    | Past Infection     | M | SYR | 1978 | 37 |
| <b>172</b> | 94    | 0.0000  | 0.0000 | 0.00    | Past Infection     | M | SYR | 1981 | 34 |
| <b>173</b> | 63.7  | 0.0000  | 0.0000 | 0.00    | Past Infection     | M | QAT | 1960 | 55 |
| <b>174</b> | 36.4  | 0.0000  | 0.0000 | 0.00    | Past Infection     | M | QAT | 1977 | 38 |
| <b>175</b> | 39    | 0.0000  | 0.0000 | 0.00    | Past Infection     | M | SYR | 1984 | 31 |
| <b>176</b> | 47.2  | 3.1035  | 0.0066 | 310.35  | Reactive Infection | M | SYR | 1972 | 43 |
| <b>177</b> | 160.2 | 2.6013  | 0.0016 | 260.13  | Past Infection     | M | EGY | 1982 | 33 |
| <b>178</b> | 37.9  | 0.0000  | 0.0000 | 0.00    | Past Infection     | M | QAT | 1983 | 32 |
| <b>179</b> | 41.7  | 0.0000  | 0.0000 | 0.00    | Past Infection     | M | SUD | 1991 | 24 |
| <b>180</b> | 40.4  | 11.4726 | 0.0284 | 1147.26 | Past Infection     | M | EGY | 1989 | 26 |
| <b>181</b> | 216.5 | 2.7404  | 0.0013 | 274.04  | Past Infection     | M | EGY | 1979 | 36 |
| <b>182</b> | 59.7  | 3.0253  | 0.0051 | 302.53  | Active Infection   | M | SUD | 1988 | 27 |
| <b>183</b> | 56.2  | 4.1341  | 0.0074 | 413.41  | Past Infection     | M | LEB | 1986 | 29 |
| <b>184</b> | 41.1  | 3.4765  | 0.0085 | 347.65  | Past Infection     | M | LEB | 1971 | 44 |
| <b>185</b> | 84.7  | 0.0000  | 0.0000 | 0.00    | Past Infection     | M | PHI | 1981 | 34 |
| <b>186</b> | 63.5  | 0.0000  | 0.0000 | 0.00    | Past Infection     | F | LEB | 1984 | 31 |
| <b>187</b> | 79.9  | 14.3280 | 0.0179 | 1432.80 | Past Infection     | M | GER | 1966 | 49 |
| <b>188</b> | 64.3  | 2.0710  | 0.0032 | 207.10  | Reactive Infection | F | US  | 1970 | 45 |
| <b>189</b> | 42.6  | 2.4349  | 0.0057 | 243.49  | Reactive Infection | F | AUS | 1972 | 43 |
| <b>190</b> | 50.1  | 0.0000  | 0.0000 | 0.00    | No Infection       | M | SYR | 1976 | 39 |
| <b>191</b> | 32.3  | 13.6329 | 0.0422 | 1363.29 | Past Infection     | M | JOR | 1965 | 50 |
| <b>192</b> | 60.5  | 0.0000  | 0.0000 | 0.00    | Past Infection     | M | QAT | 1978 | 37 |
| <b>193</b> | 75.3  | 0.0000  | 0.0000 | 0.00    | Past Infection     | M | EGY | 1982 | 33 |
| <b>195</b> | 66.8  | 4.5746  | 0.0068 | 457.46  | Past Infection     | M | IND | 1968 | 47 |
| <b>196</b> | 61.4  | 0.0000  | 0.0000 | 0.00    | Past Infection     | M | PAL | 1968 | 47 |
| <b>197</b> | 43.5  | 11.8220 | 0.0272 | 1182.20 | Past Infection     | M | EGY | 1983 | 32 |
| <b>199</b> | 51.6  | 7.7879  | 0.0151 | 778.79  | Past Infection     | M | EGY | 1975 | 40 |

|            |        |         |        |         |                    |   |        |      |    |
|------------|--------|---------|--------|---------|--------------------|---|--------|------|----|
| <b>200</b> | 64     | 0.0000  | 0.0000 | 0.00    | Past Infection     | M | QAT    | 1996 | 19 |
| <b>201</b> | 77.6   | 0.0000  | 0.0000 | 0.00    | Past Infection     | M | QAT    | 1983 | 32 |
| <b>202</b> | 59.2   | 0.0000  | 0.0000 | 0.00    | Past Infection     | M | SYR    | 1988 | 27 |
| <b>203</b> | 63.9   | 5.6775  | 0.0089 | 567.75  | Past Infection     | M | PAL    | 1973 | 42 |
| <b>204</b> | 46.9   | 0.0000  | 0.0000 | 0.00    | Past Infection     | M | SYR    | 1964 | 51 |
| <b>205</b> | 67     | 0.0000  | 0.0000 | 0.00    | Past Infection     | M | IND    | 1976 | 39 |
| <b>206</b> | 28.8   | 0.0000  | 0.0000 | 0.00    | Past Infection     | M | EGY    | 1980 | 35 |
| <b>207</b> | 35.8   | 2.4498  | 0.0068 | 244.98  | Past Infection     | M | BAN    | 1988 | 27 |
| <b>208</b> | 16.4   | 2.9383  | 0.0179 | 293.83  | Past Infection     | M | CAN    | 1970 | 45 |
| <b>209</b> | 24.9   | 0.0000  | 0.0000 | 0.00    | Past Infection     | M | IND    | 1986 | 29 |
| <b>210</b> | 35.4   | 0.6000  | 0.0017 | 60.00   | Reactive Infection | M | NEP    | 1985 | 30 |
| <b>211</b> | 46.5   | 2.9482  | 0.0063 | 294.82  | Past Infection     | M | US     | 1975 | 40 |
| <b>212</b> | 33.6   | 13.0748 | 0.0389 | 1307.48 | Early Infection    | M | Cyprus | 1996 | 19 |
| <b>213</b> | 22     | 0.0000  | 0.0000 | 0.00    | Past Infection     | M | ITA    | 1978 | 37 |
| <b>214</b> | 18.1   | 0.0000  | 0.0000 | 0.00    | Past Infection     | M | EGY    | 1988 | 27 |
| <b>215</b> | 1809.1 | 7.1411  | 0.0004 | 714.11  | Past Infection     | M | QAT    | 1982 | 33 |
| <b>216</b> | 39.2   | 18.5852 | 0.0474 | 1858.52 | Past Infection     | M | QAT    | 1969 | 46 |
| <b>217</b> | 47.2   | 0.0000  | 0.0000 | 0.00    | Past Infection     | M | EGY    | 1983 | 32 |
| <b>218</b> | 33.1   | 9.0705  | 0.0274 | 907.05  | Past Infection     | M | SYR    | 1982 | 33 |
| <b>219</b> | 34.6   | 0.0000  | 0.0000 | 0.00    | Past Infection     | M | EGY    | 1982 | 33 |
| <b>220</b> | 68.7   | 0.0000  | 0.0000 | 0.00    | Past Infection     | M | IND    | 1974 | 41 |
| <b>221</b> | 75.2   | 11.2010 | 0.0149 | 1120.10 | Past Infection     | M | EGY    | 1961 | 54 |
| <b>222</b> | 62.9   | 7.9416  | 0.0126 | 794.16  | Reactive Infection | M | QAT    | 1973 | 42 |
| <b>223</b> | 61.6   | 0.0000  | 0.0000 | 0.00    | Past Infection     | M | QAT    | 1978 | 37 |
| <b>224</b> | 33.3   | 4.4009  | 0.0132 | 440.09  | Past Infection     | M | SYR    | 1982 | 33 |
| <b>225</b> | 42     | 38.3475 | 0.0913 | 3834.75 | Past Infection     | M | EGY    | 1965 | 50 |
| <b>226</b> | 17.8   | 2.9693  | 0.0167 | 296.93  | Past Infection     | M | QAT    | 1972 | 43 |
| <b>227</b> | 34.6   | 20.8490 | 0.0603 | 2084.90 | Past Infection     | M | QAT    | 1973 | 42 |
| <b>228</b> | 90.5   | 2.7660  | 0.0031 | 276.60  | Past Infection     | M | PAL    | 1983 | 32 |
| <b>229</b> | 38.4   | 4.9599  | 0.0129 | 495.99  | Past Infection     | M | SYR    | 1959 | 56 |

|            |      |         |        |         |                    |   |      |      |    |
|------------|------|---------|--------|---------|--------------------|---|------|------|----|
| <b>230</b> | 33.2 | 0.0000  | 0.0000 | 0.00    | Past Infection     | M | EGY  | 1972 | 43 |
| <b>231</b> | 28.4 | 0.0000  | 0.0000 | 0.00    | Past Infection     | M | QAT  | 1987 | 28 |
| <b>232</b> | 13.5 | 2.6070  | 0.0193 | 260.70  | Past Infection     | M | EGY  | 1986 | 29 |
| <b>233</b> | 23.1 | 0.0000  | 0.0000 | 0.00    | Past Infection     | M | PAK  | 1972 | 43 |
| <b>234</b> | 50   | 0.0000  | 0.0000 | 0.00    | Past Infection     | M | SYR  | 1986 | 29 |
| <b>235</b> | 18.7 | 2.9011  | 0.0155 | 290.11  | Past Infection     | M | YEM  | 1982 | 33 |
| <b>236</b> | 17.2 | 0.0000  | 0.0000 | 0.00    | Past Infection     | M | SYR  | 1974 | 41 |
| <b>237</b> | 17   | 0.0000  | 0.0000 | 0.00    | Past Infection     | M | EGY  | 1982 | 33 |
| <b>238</b> | 48.1 | 3.1839  | 0.0066 | 318.39  | Past Infection     | M | SYR  | 1962 | 53 |
| <b>239</b> | 21.2 | 12.0699 | 0.0569 | 1206.99 | Past Infection     | M | UK   | 1968 | 47 |
| <b>240</b> | 9    | 2.4849  | 0.0276 | 248.49  | Past Infection     | M | EGY  | 1986 | 29 |
| <b>241</b> | 30.2 | 0.0000  | 0.0000 | 0.00    | Past Infection     | M | TUN  | 1972 | 43 |
| <b>242</b> | 15.5 | 0.0000  | 0.0000 | 0.00    | Past Infection     | M | EGY  | 1985 | 30 |
| <b>243</b> | 14.6 | 0.0000  | 0.0000 | 0.00    | Past Infection     | M | JOR  | 1962 | 53 |
| <b>244</b> | 19.1 | 0.0000  | 0.0000 | 0.00    | Past Infection     | M | EGY  | 1991 | 24 |
| <b>245</b> | 17.6 | 0.0000  | 0.0000 | 0.00    | Past Infection     | M | QAT  | 1972 | 43 |
| <b>246</b> | 23.2 | 0.0000  | 0.0000 | 0.00    | Reactive Infection | M | SYR  | 1993 | 22 |
| <b>247</b> | 19.9 | 0.0000  | 0.0000 | 0.00    | Past Infection     | M | EGY  | 1970 | 45 |
| <b>248</b> | 24.9 | 20.8376 | 0.0837 | 2083.76 | Past Infection     | M | SYR  | 1980 | 35 |
| <b>249</b> | 56.5 | 0.0000  | 0.0000 | 0.00    | Past Infection     | M | SYR  | 1980 | 35 |
| <b>250</b> | 54.9 | 0.0000  | 0.0000 | 0.00    | Reactive Infection | M | SYR  | 1989 | 26 |
| <b>251</b> | 56.5 | 0.0000  | 0.0000 | 0.00    | Past Infection     | M | QAT  | 1974 | 41 |
| <b>252</b> | 39   | 0.0000  | 0.0000 | 0.00    | Past Infection     | M | PAL  | 1995 | 20 |
| <b>253</b> | 25.6 | 0.0000  | 0.0000 | 0.00    | No Infection       | M | OMAN | 1987 | 28 |
| <b>254</b> | 41.2 | 0.0000  | 0.0000 | 0.00    | Past Infection     | M | SYR  | 1992 | 23 |
| <b>255</b> | 20.9 | 43.4738 | 0.2080 | 4347.38 | Past Infection     | M | QAT  | 1978 | 37 |
| <b>256</b> | 45.1 | 0.0000  | 0.0000 | 0.00    | Past Infection     | M | QAT  | 1959 | 56 |
| <b>257</b> | 88   | 13.9614 | 0.0159 | 1396.14 | Past Infection     | M | IRQ  | 1968 | 47 |
| <b>258</b> | 41.8 | 2.9198  | 0.0070 | 291.98  | Past Infection     | M | QAT  | 1987 | 28 |
| <b>259</b> | 33.5 | 2.2147  | 0.0066 | 221.47  | Past Infection     | M | SYR  | 1980 | 35 |

|            |      |         |        |         |                    |   |     |      |    |
|------------|------|---------|--------|---------|--------------------|---|-----|------|----|
| <b>260</b> | 42.9 | 0.0000  | 0.0000 | 0.00    | Past Infection     | M | PAL | 1975 | 40 |
| <b>261</b> | 48.7 | 12.2499 | 0.0252 | 1224.99 | Past Infection     | M | JOR | 1979 | 36 |
| <b>262</b> | 16.8 | 5.3863  | 0.0321 | 538.63  | Past Infection     | M | IND | 1986 | 29 |
| <b>263</b> | 25.1 | 0.0000  | 0.0000 | 0.00    | Past Infection     | M | EGY | 1981 | 34 |
| <b>264</b> | 42.2 | 0.0000  | 0.0000 | 0.00    | Past Infection     | M | ALG | 1989 | 26 |
| <b>265</b> | 35.4 | 0.0000  | 0.0000 | 0.00    | Past Infection     | F | EGY | 1981 | 34 |
| <b>266</b> | 20.8 | 0.0000  | 0.0000 | 0.00    | Past Infection     | M | IND | 1985 | 30 |
| <b>267</b> | 25.1 | 3.1000  | 0.0124 | 310.00  | Reactive Infection | M | IND | 1975 | 40 |
| <b>268</b> | 24.5 | 0.0000  | 0.0000 | 0.00    | Past Infection     | M | QAT | 1965 | 50 |
| <b>269</b> | 27.6 | 0.0000  | 0.0000 | 0.00    | Reactive Infection | M | QAT | 1970 | 45 |
| <b>270</b> | 22.3 | 0.0000  | 0.0000 | 0.00    | Past Infection     | M | SYR | 1977 | 38 |
| <b>271</b> | 41.2 | 0.0000  | 0.0000 | 0.00    | Past Infection     | M | SYR | 1991 | 24 |
| <b>272</b> | 38.4 | 12.5921 | 0.0328 | 1259.21 | Past Infection     | M | IND | 1975 | 40 |
| <b>273</b> | 37.5 | 0.0000  | 0.0000 | 0.00    | Past Infection     | M | EGY | 1984 | 31 |
| <b>274</b> | 36.4 | 0.0000  | 0.0000 | 0.00    | Past Infection     | M | IRN | 1976 | 39 |
| <b>275</b> | 32.5 | 11.2784 | 0.0347 | 1127.84 | Past Infection     | M | JOR | 1960 | 55 |
| <b>276</b> | 23.6 | 0.0000  | 0.0000 | 0.00    | Past Infection     | M | QAT | 1966 | 49 |
| <b>277</b> | 20.3 | 0.0000  | 0.0000 | 0.00    | Past Infection     | M | JOR | 1967 | 48 |
| <b>278</b> | 22.3 | 2.8794  | 0.0129 | 287.94  | Past Infection     | M | PAK | 1967 | 48 |
| <b>279</b> | 37.5 | 0.0000  | 0.0000 | 0.00    | Past Infection     | M | SUD | 1974 | 41 |
| <b>280</b> | 17.5 | 0.0000  | 0.0000 | 0.00    | Past Infection     | M | QAT | 1981 | 34 |
| <b>281</b> | 23   | 0.0000  | 0.0000 | 0.00    | Past Infection     | M | EGY | 1990 | 25 |
| <b>282</b> | 30.1 | 0.0000  | 0.0000 | 0.00    | Past Infection     | M | EGY | 1987 | 28 |
| <b>283</b> | 28.5 | 0.0000  | 0.0000 | 0.00    | No Infection       | M | PAL | 1984 | 31 |
| <b>284</b> | 15.5 | 0.0000  | 0.0000 | 0.00    | Past Infection     | M | QAT | 1974 | 41 |
| <b>285</b> | 31   | 2.4158  | 0.0078 | 241.58  | Past Infection     | M | SYR | 1982 | 33 |
| <b>286</b> | 21.2 | 0.0000  | 0.0000 | 0.00    | Past Infection     | M | LEB | 1980 | 35 |
| <b>287</b> | 17.7 | 0.0000  | 0.0000 | 0.00    | Past Infection     | M | EGY | 1984 | 31 |
| <b>289</b> | 10.4 | 0.0000  | 0.0000 | 0.00    | Past Infection     | M | EGY | 1986 | 29 |
| <b>290</b> | 51.4 | 1.0540  | 0.0021 | 105.40  | Reactive Infection | M | EGY | 1981 | 34 |



|            |      |         |        |         |                    |   |     |      |    |
|------------|------|---------|--------|---------|--------------------|---|-----|------|----|
| <b>291</b> | 22.3 | 2.7423  | 0.0123 | 274.23  | Past Infection     | M | IND | 1970 | 45 |
| <b>292</b> | 11.1 | 2.5955  | 0.0234 | 259.55  | Past Infection     | M | JOR | 1974 | 41 |
| <b>293</b> | 29.4 | 0.0000  | 0.0000 | 0.00    | Recent Active      | M | SYR | 1979 | 36 |
| <b>294</b> | 22   | 0.4770  | 0.0022 | 47.70   | Active Infection   | M | QAT | 1986 | 29 |
| <b>295</b> | 16.8 | 0.9443  | 0.0056 | 94.43   | Past Infection     | M | QAT | 1976 | 39 |
| <b>296</b> | 24.7 | 0.0000  | 0.0000 | 0.00    | Past Infection     | M | EGY | 1980 | 35 |
| <b>297</b> | 18.8 | 1.3085  | 0.0070 | 130.85  | Past Infection     | M | EGY | 1975 | 40 |
| <b>298</b> | 11.8 | 0.0000  | 0.0000 | 0.00    | Past Infection     | M | SYR | 1972 | 43 |
| <b>299</b> | 12.9 | 0.0000  | 0.0000 | 0.00    | Reactive Infection | F | EGY | 1994 | 21 |
| <b>301</b> | 6.2  | 0.0000  | 0.0000 | 0.00    | Past Infection     | M | JOR | 1987 | 28 |
| <b>303</b> | 12.1 | 0.0000  | 0.0000 | 0.00    | Past Infection     | M | QAT | 1986 | 29 |
| <b>304</b> | 16.2 | 0.0000  | 0.0000 | 0.00    | Past Infection     | M | PAL | 1973 | 42 |
| <b>305</b> | 11.7 | 5.5443  | 0.0474 | 554.43  | Past Infection     | M | SYR | 1983 | 32 |
| <b>306</b> | 17.9 | 0.0000  | 0.0000 | 0.00    | Past Infection     | M | IRN | 1994 | 21 |
| <b>307</b> | 20.1 | 0.0000  | 0.0000 | 0.00    | Past Infection     | M | EGY | 1967 | 48 |
| <b>308</b> | 22.4 | 0.0000  | 0.0000 | 0.00    | Past Infection     | M | PAL | 1985 | 30 |
| <b>309</b> | 7.4  | 0.0000  | 0.0000 | 0.00    | Past Infection     | M | YEM | 1982 | 33 |
| <b>311</b> | 37.7 | 0.0000  | 0.0000 | 0.00    | Past Infection     | M | BAN | 1974 | 41 |
| <b>312</b> | 28.7 | 10.0523 | 0.0350 | 1005.23 | Past Infection     | M | SYR | 1982 | 33 |
| <b>313</b> | 26.2 | 4.9064  | 0.0187 | 490.64  | Past Infection     | M | SUD | 1977 | 38 |
| <b>314</b> | 10.2 | 0.0000  | 0.0000 | 0.00    | Past Infection     | M | QAT | 1972 | 43 |
| <b>315</b> | 22   | 0.0000  | 0.0000 | 0.00    | Past Infection     | M | SYR | 1980 | 35 |
| <b>316</b> | 44   | 0.0000  | 0.0000 | 0.00    | Past Infection     | M | NEP | 1988 | 27 |
| <b>317</b> | 67.9 | 0.0000  | 0.0000 | 0.00    | Past Infection     | M | BAN | 1988 | 27 |
| <b>318</b> | 46.9 | 0.0000  | 0.0000 | 0.00    | Past Infection     | M | EGY | 1982 | 33 |
| <b>319</b> | 46   | 6.7969  | 0.0148 | 679.69  | Past Infection     | M | QAT | 1960 | 55 |
| <b>320</b> | 56.5 | 0.0000  | 0.0000 | 0.00    | Past Infection     | M | QAT | 1977 | 38 |
| <b>321</b> | 47.6 | 0.8516  | 0.0018 | 85.16   | Past Infection     | M | PAK | 1991 | 24 |
| <b>322</b> | 34.7 | 29.3651 | 0.0846 | 2936.51 | Past Infection     | M | LEB | 1987 | 28 |
| <b>323</b> | 53   | 0.0000  | 0.0000 | 0.00    | Past Infection     | M | IRQ | 1967 | 48 |

|            |      |        |        |         |                    |   |          |      |    |
|------------|------|--------|--------|---------|--------------------|---|----------|------|----|
| <b>324</b> | 59.1 | 1.0639 | 0.0018 | 106.39  | Past Infection     | M | QAT      | 1974 | 41 |
| <b>325</b> | 19.6 | 0.0000 | 0.0000 | 0.00    | Past Infection     | M | LEB      | 1982 | 33 |
| <b>326</b> | 44.6 | 4.5491 | 0.0102 | 454.91  | Past Infection     | M | QAT      | 1989 | 26 |
| <b>327</b> | 24   | 0.0000 | 0.0000 | 0.00    | Reactive Infection | M | SUD      | 1988 | 27 |
| <b>328</b> | 43.9 | 2.8327 | 0.0065 | 283.27  | Past Infection     | M | SUD      | 1954 | 61 |
| <b>329</b> | 39.4 | 7.9335 | 0.0201 | 793.35  | Past Infection     | M | IRQ      | 1988 | 27 |
| <b>330</b> | 50.7 | 0.0000 | 0.0000 | 0.00    | Past Infection     | M | PAL      | 1957 | 58 |
| <b>331</b> | 53.6 | 0.0000 | 0.0000 | 0.00    | Past Infection     | M | SYR      | 1981 | 34 |
| <b>332</b> | 61.1 | 0.0000 | 0.0000 | 0.00    | Past Infection     | M | OMAN     | 1976 | 39 |
| <b>333</b> | 49.8 | 1.6656 | 0.0033 | 166.56  | Past Infection     | M | SYR      | 1970 | 45 |
| <b>334</b> | 47.1 | 1.7109 | 0.0036 | 171.09  | Past Infection     | M | SAUDI    | 1994 | 21 |
| <b>335</b> | 43.7 | 4.3837 | 0.0100 | 438.37  | Past Infection     | M | EGY      | 1989 | 26 |
| <b>336</b> | 23.3 | 1.8813 | 0.0081 | 188.13  | Past Infection     | M | QAT      | 1985 | 30 |
| <b>337</b> | 33.8 | 0.0000 | 0.0000 | 0.00    | Reactive Infection | M | SYR      | 1977 | 38 |
| <b>338</b> | 29.5 | 1.6671 | 0.0057 | 166.71  | Past Infection     | M | EGY      | 1984 | 31 |
| <b>339</b> | 54.4 | 0.0000 | 0.0000 | 0.00    | No Infection       | M | AUS      | 1977 | 38 |
| <b>341</b> | 80   | 0.0000 | 0.0000 | 0.00    | Past Infection     | M | SYR      | 1981 | 34 |
| <b>342</b> | 72.4 | 9.3654 | 0.0129 | 936.54  | Past Infection     | M | EGY      | 1969 | 46 |
| <b>343</b> | 48.2 | 2.2904 | 0.0048 | 229.04  | Past Infection     | M | LEB      | 1982 | 33 |
| <b>344</b> | 57   | 1.7015 | 0.0030 | 170.15  | Past Infection     | M | SYR      | 1975 | 40 |
| <b>345</b> | 65.2 | 2.0154 | 0.0031 | 201.54  | Past Infection     | M | EGY      | 1980 | 35 |
| <b>346</b> | 220  | 1.8322 | 0.0008 | 183.22  | Past Infection     | M | ERITERIA | 1976 | 39 |
| <b>347</b> | 33.4 | 7.5767 | 0.0227 | 757.67  | Past Infection     | M | QAT      | 1978 | 37 |
| <b>348</b> | 26.6 | 0.0000 | 0.0000 | 0.00    | Past Infection     | M | QAT      | 1963 | 52 |
| <b>349</b> | 59.5 | 0.0000 | 0.0000 | 0.00    | Past Infection     | M | EGY      | 1970 | 45 |
| <b>350</b> | 48.2 | 0.0000 | 0.0000 | 0.00    | No Infection       | M | JOR      | 1989 | 26 |
| <b>351</b> | 38.9 | 0.0000 | 0.0000 | 0.00    | Reactive Infection | M | YEM      | 1981 | 34 |
| <b>352</b> | 34.7 | 0.0000 | 0.0000 | 0.00    | Past Infection     | M | QAT      | 1977 | 38 |
| <b>353</b> | 11.9 | 0.0000 | 0.0000 | 0.00    | Reactive Infection | M | PAL      | 1973 | 42 |
| <b>354</b> | 22.7 | 46.084 | 0.2030 | 4608.37 | Past Infection     | M | QAT      | 1969 | 46 |

|            |      |          |        |          |                    |   |     |      |    |
|------------|------|----------|--------|----------|--------------------|---|-----|------|----|
| <b>355</b> | 34.9 | 37.8201  | 0.1084 | 3782.01  | Past Infection     | M | PAL | 1980 | 35 |
| <b>356</b> | 24.2 | 1.3406   | 0.0055 | 134.06   | Reactive Infection | M | IND | 1989 | 26 |
| <b>357</b> | 0    | 0.0000   | 0.0000 | 0.00     | Past Infection     | M | QAT | 1968 | 47 |
| <b>358</b> | 11.6 | 0.0000   | 0.0000 | 0.00     | Recent Active      | M | QAT | 1955 | 60 |
| <b>359</b> | 15.5 | 0.0000   | 0.0000 | 0.00     | Past Infection     | M | QAT | 1982 | 33 |
| <b>360</b> | 20.3 | 1.4196   | 0.0070 | 141.96   | Past Infection     | M | MOR | 1985 | 30 |
| <b>361</b> | 25.6 | 0.0000   | 0.0000 | 0.00     | Past Infection     | M | SYR | 1957 | 58 |
| <b>362</b> | 26.6 | 0.0000   | 0.0000 | 0.00     | Past Infection     | M | EGY | 1987 | 28 |
| <b>364</b> | 33.6 | 0.0000   | 0.0000 | 0.00     | Past Infection     | M | QAT | 1987 | 28 |
| <b>365</b> | 32.3 | 0.0000   | 0.0000 | 0.00     | Past Infection     | M | QAT | 1963 | 52 |
| <b>366</b> | 40.5 | 1.2096   | 0.0030 | 120.96   | Past Infection     | M | SYR | 1986 | 29 |
| <b>367</b> | 38.8 | 4.6254   | 0.0119 | 462.54   | Past Infection     | M | SYR | 1984 | 31 |
| <b>368</b> | 38.2 | 0.0000   | 0.0000 | 0.00     | Past Infection     | M | IND | 1970 | 45 |
| <b>369</b> | 37.2 | 1.1478   | 0.0031 | 114.78   | Past Infection     | M | SYR | 1988 | 27 |
| <b>370</b> | 36.1 | 0.0000   | 0.0000 | 0.00     | Past Infection     | M | PAK | 1969 | 46 |
| <b>371</b> | 39.9 | 16.3739  | 0.0410 | 1637.39  | Past Infection     | M | QAT | 1961 | 54 |
| <b>372</b> | 14.5 | 4.5875   | 0.0316 | 458.75   | Past Infection     | M | QAT | 1960 | 55 |
| <b>373</b> | 22.6 | 1.6085   | 0.0071 | 160.85   | Past Infection     | M | FRA | 1980 | 35 |
| <b>374</b> | 27.7 | 1.1163   | 0.0040 | 111.63   | Past Infection     | M | QAT | 1969 | 46 |
| <b>376</b> | 14.4 | 2.6296   | 0.0183 | 262.96   | Past Infection     | M | PAL | 1964 | 51 |
| <b>377</b> | 43   | 187.2940 | 0.4356 | 18729.40 | Active Infection   | M | SYR | 1965 | 50 |
| <b>378</b> | 50.8 | 26.0108  | 0.0512 | 2601.08  | Past Infection     | F | SYR | 1974 | 41 |
| <b>379</b> | 26.1 | 2.2409   | 0.0086 | 224.09   | Past Infection     | M | YEM | 1977 | 38 |
| <b>380</b> | 21.3 | 0.0000   | 0.0000 | 0.00     | Reactive Infection | M | SYR | 1980 | 35 |
| <b>381</b> | 32.5 | 2.7885   | 0.0086 | 278.85   | Past Infection     | M | EGY | 1974 | 41 |
| <b>382</b> | 44.3 | 0.0000   | 0.0000 | 0.00     | Past Infection     | M | IND | 1983 | 32 |
| <b>383</b> | 30.8 | 0.0000   | 0.0000 | 0.00     | Past Infection     | M | LEB | 1987 | 28 |
| <b>384</b> | 23.9 | 0.0000   | 0.0000 | 0.00     | Past Infection     | M | EGY | 1971 | 44 |
| <b>385</b> | 36.7 | 0.0000   | 0.0000 | 0.00     | Reactive Infection | M | CAN | 1975 | 40 |
| <b>386</b> | 40.2 | 0.0000   | 0.0000 | 0.00     | Past Infection     | M | QAT | 1969 | 46 |

|            |      |         |        |         |                    |   |        |      |    |
|------------|------|---------|--------|---------|--------------------|---|--------|------|----|
| <b>387</b> | 23.8 | 0.0000  | 0.0000 | 0.00    | Reactive Infection | M | EGY    | 1975 | 40 |
| <b>388</b> | 62.8 | 7.2658  | 0.0116 | 726.58  | Past Infection     | M | EGY    | 1977 | 38 |
| <b>389</b> | 20.6 | 0.0000  | 0.0000 | 0.00    | Past Infection     | M | QAT    | 1989 | 26 |
| <b>390</b> | 26   | 0.6854  | 0.0026 | 68.54   | Past Infection     | M | IND    | 1957 | 58 |
| <b>391</b> | 38.2 | 10.2255 | 0.0268 | 1022.55 | Past Infection     | M | EGY    | 1981 | 34 |
| <b>392</b> | 14.8 | 2.3364  | 0.0158 | 233.64  | Active Infection   | M | EGY    | 1972 | 43 |
| <b>393</b> | 50.1 | 3.8531  | 0.0077 | 385.31  | Past Infection     | M | JOR    | 1988 | 27 |
| <b>394</b> | 53   | 2.0946  | 0.0040 | 209.46  | Past Infection     | M | PAK    | 1977 | 38 |
| <b>395</b> | 40.4 | 3.6074  | 0.0089 | 360.74  | Past Infection     | M | PAL    | 1969 | 46 |
| <b>396</b> | 40.9 | 2.3614  | 0.0058 | 236.14  | Past Infection     | M | PAL    | 1955 | 60 |
| <b>397</b> | 58.6 | 14.1400 | 0.0241 | 1414.00 | Past Infection     | M | EGY    | 1968 | 47 |
| <b>398</b> | 37.8 | 6.5764  | 0.0174 | 657.64  | Past Infection     | M | LEB    | 1985 | 30 |
| <b>399</b> | 52.1 | 3.6294  | 0.0070 | 362.94  | Past Infection     | M | PAK    | 1982 | 33 |
| <b>400</b> | 28.6 | 1.4988  | 0.0052 | 149.88  | Past Infection     | M | GREECE | 1976 | 39 |
| <b>401</b> | 34.4 | 0.0000  | 0.0000 | 0.00    | No Infection       | M | JOR    | 1989 | 26 |
| <b>402</b> | 64.6 | 3.5460  | 0.0055 | 354.60  | Past Infection     | M | IND    | 1982 | 33 |
| <b>403</b> | 82.8 | 21.0599 | 0.0254 | 2105.99 | Past Infection     | M | PAK    | 1983 | 32 |
| <b>404</b> | 95.9 | 8.0973  | 0.0084 | 809.73  | Past Infection     | M | US     | 1972 | 43 |
| <b>405</b> | 63.4 | 0.0000  | 0.0000 | 0.00    | Past Infection     | M | IND    | 1985 | 30 |
| <b>406</b> | 28.4 | 1.8568  | 0.0065 | 185.68  | Past Infection     | M | EGY    | 1982 | 33 |
| <b>407</b> | 40.6 | 0.0000  | 0.0000 | 0.00    | Past Infection     | M | EGY    | 1968 | 47 |
| <b>408</b> | 37.5 | 3.8522  | 0.0103 | 385.22  | Past Infection     | M | SYR    | 1979 | 36 |
| <b>409</b> | 63.8 | 86.4255 | 0.1355 | 8642.55 | Past Infection     | M | IRN    | 1989 | 26 |
| <b>410</b> | 29.4 | 0.0000  | 0.0000 | 0.00    | Past Infection     | M | SYR    | 1980 | 35 |
| <b>411</b> | 32.6 | 0.0000  | 0.0000 | 0.00    | Past Infection     | M | SYR    | 1970 | 45 |
| <b>412</b> | 26.1 | 0.0000  | 0.0000 | 0.00    | Past Infection     | M | IRN    | 1995 | 20 |
| <b>413</b> | 25.8 | 1.6746  | 0.0065 | 167.46  | Past Infection     | M | SYR    | 1983 | 32 |
| <b>414</b> | 65.1 | 0.0000  | 0.0000 | 0.00    | Past Infection     | M | SYR    | 1977 | 38 |
| <b>415</b> | 43.3 | 0.0000  | 0.0000 | 0.00    | Past Infection     | M | QAT    | 1991 | 24 |
| <b>416</b> | 28.1 | 0.0000  | 0.0000 | 0.00    | Past Infection     | M | IRN    | 1970 | 45 |

|     |       |         |        |         |                    |   |         |      |    |
|-----|-------|---------|--------|---------|--------------------|---|---------|------|----|
| 417 | 30.2  | 0.0000  | 0.0000 | 0.00    | Past Infection     | M | SYR     | 1983 | 32 |
| 418 | 53    | 0.0000  | 0.0000 | 0.00    | Past Infection     | M | IND     | 1989 | 26 |
| 419 | 38.2  | 2.8397  | 0.0074 | 283.97  | Past Infection     | M | SYR     | 1980 | 35 |
| 420 | 50.8  | 0.0000  | 0.0000 | 0.00    | Past Infection     | M | SYR     | 1974 | 41 |
| 421 | 55.3  | 6.0881  | 0.0110 | 608.81  | Past Infection     | M | JOR     | 1979 | 36 |
| 422 | 37.8  | 0.0000  | 0.0000 | 0.00    | Past Infection     | M | EGY     | 1975 | 40 |
| 423 | 63.6  | 0.0000  | 0.0000 | 0.00    | Past Infection     | M | UK      | 1984 | 31 |
| 424 | 35    | 0.0000  | 0.0000 | 0.00    | Reactive Infection | M | PHI     | 1979 | 36 |
| 426 | 71.1  | 29.9942 | 0.0422 | 2999.42 | Past Infection     | M | SYR     | 1989 | 26 |
| 427 | 80.7  | 0.0000  | 0.0000 | 0.00    | Past Infection     | M | SRL     | 1981 | 34 |
| 428 | 80.6  | 3.7764  | 0.0047 | 377.64  | Past Infection     | M | EGY     | 1976 | 39 |
| 429 | 68.6  | 1.6737  | 0.0024 | 167.37  | Past Infection     | M | SYR     | 1967 | 48 |
| 430 | 83.3  | 2.9514  | 0.0035 | 295.14  | Past Infection     | M | QAT     | 1988 | 27 |
| 431 | 79.3  | 0.0000  | 0.0000 | 0.00    | Past Infection     | M | QAT     | 1974 | 41 |
| 432 | 98.9  | 66.6484 | 0.0674 | 6664.84 | Past Infection     | M | IRN     | 1969 | 46 |
| 433 | 49.6  | 1.7398  | 0.0035 | 173.98  | Past Infection     | M | QAT     | 1980 | 35 |
| 434 | 120.2 | 3.2846  | 0.0027 | 328.46  | Reactive Infection | M | QAT     | 1959 | 56 |
| 435 | 86.9  | 0.0000  | 0.0000 | 0.00    | Reactive Infection | M | YEM     | 1970 | 45 |
| 436 | 84    | 0.0000  | 0.0000 | 0.00    | Reactive Infection | M | SYR     | 1986 | 29 |
| 437 | 50.7  | 9.9341  | 0.0196 | 993.41  | Past Infection     | M | EGY     | 1982 | 33 |
| 438 | 65.2  | 0.0000  | 0.0000 | 0.00    | Past Infection     | M | QAT     | 1977 | 38 |
| 439 | 55.1  | 0.0000  | 0.0000 | 0.00    | Past Infection     | M | SRL     | 1969 | 46 |
| 440 | 44.1  | 1.8498  | 0.0042 | 184.98  | Past Infection     | M | EGY     | 1979 | 36 |
| 441 | 101.6 | 1.4673  | 0.0014 | 146.73  | Past Infection     | M | SYR     | 1968 | 47 |
| 442 | 60.5  | 0.0000  | 0.0000 | 0.00    | Past Infection     | M | LEB     | 1974 | 41 |
| 443 | 47.8  | 2.8106  | 0.0059 | 281.06  | Past Infection     | M | CROATIA | 1981 | 34 |
| 444 | 80    | 0.0000  | 0.0000 | 0.00    | Past Infection     | M | SYR     | 1982 | 33 |
| 445 | 87.3  | 2.8470  | 0.0033 | 284.70  | Past Infection     | M | SYR     | 1975 | 40 |
| 446 | 77.1  | 0.0000  | 0.0000 | 0.00    | Reactive Infection | F | EGY     | 1991 | 24 |
| 447 | 49.4  | 0.0000  | 0.0000 | 0.00    | Past Infection     | F | QAT     | 1996 | 19 |

|            |       |         |        |         |                    |   |       |      |    |
|------------|-------|---------|--------|---------|--------------------|---|-------|------|----|
| <b>448</b> | 50.1  | 2.0350  | 0.0041 | 203.50  | Active Infection   | M | IND   | 1977 | 38 |
| <b>449</b> | 81.7  | 0.0000  | 0.0000 | 0.00    | Past Infection     | M | BAN   | 1994 | 21 |
| <b>450</b> | 63.3  | 0.0000  | 0.0000 | 0.00    | Past Infection     | M | BAN   | 1968 | 47 |
| <b>451</b> | 63.4  | 1.4692  | 0.0023 | 146.92  | Past Infection     | M | BAN   | 1962 | 53 |
| <b>452</b> | 78.1  | 0.0000  | 0.0000 | 0.00    | Past Infection     | M | BAN   | 1986 | 29 |
| <b>453</b> | 91.2  | 2.7352  | 0.0030 | 273.52  | Past Infection     | M | BAN   | 1973 | 42 |
| <b>454</b> | 54.6  | 0.0000  | 0.0000 | 0.00    | Past Infection     | M | SRL   | 1980 | 35 |
| <b>455</b> | 49.4  | 29.8431 | 0.0604 | 2984.31 | Past Infection     | M | SAUDI | 1991 | 24 |
| <b>456</b> | 53.4  | 0.0000  | 0.0000 | 0.00    | Past Infection     | M | IND   | 1984 | 31 |
| <b>457</b> | 73.7  | 0.0000  | 0.0000 | 0.00    | Reactive Infection | M | UK    | 1963 | 52 |
| <b>458</b> | 61.4  | 0.0000  | 0.0000 | 0.00    | Past Infection     | M | IND   | 1989 | 26 |
| <b>459</b> | 55.8  | 1.5673  | 0.0028 | 156.73  | Past Infection     | M | SYR   | 1978 | 37 |
| <b>460</b> | 66.6  | 0.0000  | 0.0000 | 0.00    | Past Infection     | M | IND   | 1989 | 26 |
| <b>461</b> | 52.4  | 1.8266  | 0.0035 | 182.66  | Past Infection     | M | IND   | 1985 | 30 |
| <b>462</b> | 66.6  | 1.7361  | 0.0026 | 173.61  | Past Infection     | M | QAT   | 1970 | 45 |
| <b>463</b> | 67.9  | 2.1362  | 0.0031 | 213.62  | Past Infection     | M | QAT   | 1975 | 40 |
| <b>464</b> | 70.4  | 0.0000  | 0.0000 | 0.00    | Past Infection     | M | JOR   | 1978 | 37 |
| <b>465</b> | 83.8  | 0.0000  | 0.0000 | 0.00    | Past Infection     | M | PHI   | 1961 | 54 |
| <b>466</b> | 68.8  | 14.5561 | 0.0212 | 1455.61 | Past Infection     | M | PAL   | 1968 | 47 |
| <b>467</b> | 78.8  | 3.0620  | 0.0039 | 306.20  | Past Infection     | M | PAL   | 1993 | 22 |
| <b>468</b> | 58.1  | 0.0000  | 0.0000 | 0.00    | No Infection       | M | QAT   | 1991 | 24 |
| <b>469</b> | 110.1 | 7.8664  | 0.0071 | 786.64  | Past Infection     | M | BAN   | 1993 | 22 |
| <b>470</b> | 90.7  | 0.0000  | 0.0000 | 0.00    | Past Infection     | F | PHI   | 1993 | 22 |
| <b>471</b> | 67.3  | 3.3560  | 0.0050 | 335.60  | Past Infection     | M | PAL   | 1973 | 42 |
| <b>472</b> | 94.7  | 3.2556  | 0.0034 | 325.56  | Past Infection     | M | QAT   | 1969 | 46 |
| <b>473</b> | 110.3 | 3.9432  | 0.0036 | 394.32  | Past Infection     | M | EGY   | 1973 | 42 |
| <b>474</b> | 182.2 | 11.2361 | 0.0062 | 1123.61 | Past Infection     | M | EGY   | 1975 | 40 |
| <b>475</b> | 149.9 | 0.0000  | 0.0000 | 0.00    | Past Infection     | M | IND   | 1985 | 30 |
| <b>476</b> | 132.8 | 23.0670 | 0.0174 | 2306.70 | Past Infection     | M | EGY   | 1990 | 25 |
| <b>477</b> | 84.4  | 5.7746  | 0.0068 | 577.46  | Past Infection     | M | SAUDI | 1950 | 65 |

|            |       |         |        |         |                |   |     |      |    |
|------------|-------|---------|--------|---------|----------------|---|-----|------|----|
| <b>478</b> | 126.4 | 2.2954  | 0.0018 | 229.54  | Past Infection | M | QAT | 1969 | 46 |
| <b>479</b> | 115.1 | 0.0000  | 0.0000 | 0.00    | Past Infection | M | IND | 1973 | 42 |
| <b>480</b> | 112.1 | 3.2142  | 0.0029 | 321.42  | Past Infection | M | IND | 1992 | 23 |
| <b>481</b> | 136.4 | 0.0000  | 0.0000 | 0.00    | Past Infection | M | IND | 1967 | 48 |
| <b>482</b> | 102.6 | 0.0000  | 0.0000 | 0.00    | Past Infection | M | NEP | 1982 | 33 |
| <b>483</b> | 43.8  | 0.0000  | 0.0000 | 0.00    | Past Infection | M | PAL | 1973 | 42 |
| <b>484</b> | 119.3 | 7.8623  | 0.0066 | 786.23  | Past Infection | M | EGY | 1985 | 30 |
| <b>485</b> | 143.6 | 3.4666  | 0.0024 | 346.66  | Past Infection | M | IND | 1986 | 29 |
| <b>486</b> | 95.7  | 0.0000  | 0.0000 | 0.00    | Past Infection | M | PAL | 1972 | 43 |
| <b>487</b> | 104.1 | 0.0000  | 0.0000 | 0.00    | Past Infection | M | NEP | 1979 | 36 |
| <b>488</b> | 94    | 0.0000  | 0.0000 | 0.00    | Past Infection | M | SUD | 1988 | 27 |
| <b>489</b> | 138.8 | 8.7033  | 0.0063 | 870.33  | Past Infection | M | IND | 1983 | 32 |
| <b>490</b> | 90.6  | 2.4732  | 0.0027 | 247.32  | Past Infection | M | SYR | 1975 | 40 |
| <b>491</b> | 102.3 | 33.6520 | 0.0329 | 3365.20 | Past Infection | M | PAK | 1975 | 40 |
| <b>492</b> | 149.4 | 2.1493  | 0.0014 | 214.93  | Past Infection | M | BAN | 1986 | 29 |
| <b>493</b> | 86.9  | 0.0000  | 0.0000 | 0.00    | Past Infection | M | QAT | 1981 | 34 |
| <b>494</b> | 129.7 | 1.4419  | 0.0011 | 144.19  | Past Infection | M | SRL | 1985 | 30 |
| <b>495</b> | 31.8  | 0.0000  | 0.0000 | 0.00    | Past Infection | M | QAT | 1993 | 22 |
| <b>496</b> | 105.9 | 0.0000  | 0.0000 | 0.00    | Past Infection | M | IND | 1971 | 44 |
| <b>497</b> | 109.8 | 8.9340  | 0.0081 | 893.40  | Past Infection | M | SYR | 1990 | 25 |
| <b>498</b> | 123.2 | 0.0000  | 0.0000 | 0.00    | Past Infection | M | QAT | 1982 | 33 |
| <b>499</b> | 78.6  | 0.0000  | 0.0000 | 0.00    | Past Infection | M | QAT | 1973 | 42 |
| <b>500</b> | 54.8  | 29.2937 | 0.0535 | 2929.37 | Past Infection | M | QAT | 1954 | 61 |
| <b>501</b> | 76.4  | 0.0000  | 0.0000 | 0.00    | Past Infection | M | QAT | 1963 | 52 |
| <b>502</b> | 52.4  | 0.0000  | 0.0000 | 0.00    | Past Infection | M | QAT | 1978 | 37 |
| <b>503</b> | 70.9  | 0.0000  | 0.0000 | 0.00    | Past Infection | M | SRL | 1972 | 43 |
| <b>504</b> | 91.9  | 11.1446 | 0.0121 | 1114.46 | Past Infection | M | EGY | 1984 | 31 |
| <b>505</b> | 47.4  | 1.2661  | 0.0027 | 126.61  | Past Infection | M | EGY | 1984 | 31 |
| <b>506</b> | 76.9  | 0.0000  | 0.0000 | 0.00    | Past Infection | M | EGY | 1981 | 34 |
| <b>507</b> | 84    | 0.2391  | 0.0003 | 23.91   | Past Infection | M | QAT | 1977 | 38 |

|            |       |          |        |          |                    |   |         |      |    |
|------------|-------|----------|--------|----------|--------------------|---|---------|------|----|
| <b>508</b> | 112.3 | 8.7330   | 0.0078 | 873.30   | Past Infection     | M | QAT     | 1984 | 31 |
| <b>509</b> | 99.3  | 1.1780   | 0.0012 | 117.80   | Reactive Infection | M | SUD     | 1975 | 40 |
| <b>510</b> | 48.4  | 0.0000   | 0.0000 | 0.00     | Past Infection     | M | QAT     | 1989 | 26 |
| <b>511</b> | 83.3  | 2.8285   | 0.0034 | 282.85   | Past Infection     | M | IND     | 1983 | 32 |
| <b>512</b> | 50.3  | 0.0000   | 0.0000 | 0.00     | Past Infection     | M | SYR     | 1983 | 32 |
| <b>513</b> | 40    | 0.0000   | 0.0000 | 0.00     | Past Infection     | M | IND     | 1982 | 33 |
| <b>514</b> | 55.4  | 0.0000   | 0.0000 | 0.00     | Past Infection     | M | IND     | 1988 | 27 |
| <b>515</b> | 289.2 | 5.3303   | 0.0018 | 533.03   | Past Infection     | M | IND     | 1987 | 28 |
| <b>516</b> | 50.2  | 0.0000   | 0.0000 | 0.00     | Reactive Infection | M | IND     | 1984 | 31 |
| <b>517</b> | 39.8  | 0.0000   | 0.0000 | 0.00     | Past Infection     | M | PAL     | 1984 | 31 |
| <b>518</b> | 55.8  | 1.4214   | 0.0025 | 142.14   | Past Infection     | M | LEB     | 1988 | 27 |
| <b>519</b> | 50.4  | 0.0000   | 0.0000 | 0.00     | Past Infection     | M | PAL     | 1979 | 36 |
| <b>520</b> | 48.4  | 0.0000   | 0.0000 | 0.00     | Past Infection     | M | IND     | 1966 | 49 |
| <b>521</b> | 63.1  | 1.3346   | 0.0021 | 133.46   | Past Infection     | M | QAT     | 1989 | 26 |
| <b>522</b> | 48.7  | 0.0000   | 0.0000 | 0.00     | Past Infection     | M | ECUADUR | 1987 | 28 |
| <b>523</b> | 66.2  | 2.1436   | 0.0032 | 214.36   | Past Infection     | M | SYR     | 1981 | 34 |
| <b>524</b> | 56.4  | 0.0000   | 0.0000 | 0.00     | Reactive Infection | M | EGY     | 1973 | 42 |
| <b>525</b> | 34.1  | 0.0000   | 0.0000 | 0.00     | Past Infection     | M | EGY     | 1977 | 38 |
| <b>526</b> | 39.1  | 13.2300  | 0.0338 | 1323.00  | Past Infection     | M | IND     | 1987 | 28 |
| <b>527</b> | 71.1  | 3.3120   | 0.0047 | 331.20   | Reactive Infection | M | QAT     | 1972 | 43 |
| <b>528</b> | 45.2  | 11.6030  | 0.0257 | 1160.30  | Past Infection     | M | EGY     | 1977 | 38 |
| <b>529</b> | 62.9  | 5.8700   | 0.0093 | 587.00   | Past Infection     | M | JOR     | 1963 | 52 |
| <b>530</b> | 65.2  | 8.9600   | 0.0137 | 896.00   | Past Infection     | M | SYR     | 1980 | 35 |
| <b>531</b> | 75.6  | 0.0000   | 0.0000 | 0.00     | Past Infection     | M | IND     | 1988 | 27 |
| <b>532</b> | 79.5  | 35.2700  | 0.0444 | 3527.00  | Reactive Infection | M | NEP     | 1977 | 38 |
| <b>533</b> | 79.4  | 0.0000   | 0.0000 | 0.00     | Past Infection     | M | PHI     | 1977 | 38 |
| <b>534</b> | 76.4  | 16.4230  | 0.0215 | 1642.30  | Past Infection     | M | IND     | 1978 | 37 |
| <b>535</b> | 52.4  | 1.3160   | 0.0025 | 131.60   | Reactive Infection | M | ETH     | 1985 | 30 |
| <b>536</b> | 70.9  | 0.0000   | 0.0000 | 0.00     | Past Infection     | M | IRN     | 1966 | 49 |
| <b>537</b> | 91.9  | 229.7500 | 0.2500 | 22975.00 | Past Infection     | M | QAT     | 1983 | 32 |



|            |       |         |        |         |                    |   |     |      |    |
|------------|-------|---------|--------|---------|--------------------|---|-----|------|----|
| <b>538</b> | 47.4  | 1.0430  | 0.0022 | 104.30  | Early Infection    | M | PAK | 1976 | 39 |
| <b>539</b> | 76.9  | 0.0000  | 0.0000 | 0.00    | Past Infection     | M | PAL | 1979 | 36 |
| <b>541</b> | 84    | 0.0000  | 0.0000 | 0.00    | Past Infection     | M | EGY | 1972 | 43 |
| <b>542</b> | 112.3 | 5.2440  | 0.0047 | 524.40  | Past Infection     | M | JOR | 1964 | 51 |
| <b>543</b> | 99.3  | 4.4830  | 0.0045 | 448.30  | Past Infection     | M | SYR | 1972 | 43 |
| <b>544</b> | 48.4  | 0.0000  | 0.0000 | 0.00    | Past Infection     | M | SYR | 1974 | 41 |
| <b>545</b> | 83.3  | 1.3680  | 0.0016 | 136.80  | Past Infection     | M | NEP | 1965 | 50 |
| <b>546</b> | 50.3  | 0.0000  | 0.0000 | 0.00    | Past Infection     | M | JOR | 1954 | 61 |
| <b>547</b> | 40    | 1.3410  | 0.0034 | 134.10  | Reactive Infection | M | ETH | 1984 | 31 |
| <b>548</b> | 55.4  | 0.0000  | 0.0000 | 0.00    | Past Infection     | M | YEM | 1985 | 30 |
| <b>549</b> | 289.2 | 0.0000  | 0.0000 | 0.00    | Past Infection     | M | QAT | 1982 | 33 |
| <b>550</b> | 50.2  | 13.8490 | 0.0276 | 1384.90 | Past Infection     | M | PAL | 1958 | 57 |
| <b>551</b> | 39.8  | 0.0000  | 0.0000 | 0.00    | Past Infection     | M | EGY | 1981 | 34 |
| <b>552</b> | 55.8  | 55.4110 | 0.0993 | 5541.10 | Reactive Infection | M | JOR | 1974 | 41 |
| <b>553</b> | 50.4  | 2.7070  | 0.0054 | 270.70  | Past Infection     | M | SUD | 1970 | 45 |
| <b>554</b> | 48.4  | 29.5000 | 0.0610 | 2950.00 | Past Infection     | F | PHI | 1979 | 36 |
| <b>555</b> | 63.1  | 35.4120 | 0.0561 | 3541.20 | Past Infection     | M | QAT | 1982 | 33 |
| <b>556</b> | 48.7  | 12.6510 | 0.0260 | 1265.10 | Past Infection     | M | PAL | 1968 | 47 |
| <b>557</b> | 66.2  | 1.3140  | 0.0020 | 131.40  | Past Infection     | M | SYR | 1979 | 36 |
| <b>558</b> | 56.4  | 4.8430  | 0.0086 | 484.30  | Past Infection     | M | EGY | 1974 | 41 |
| <b>559</b> | 34.1  | 0.0000  | 0.0000 | 0.00    | Past Infection     | M | JOR | 1986 | 29 |
| <b>560</b> | 39.1  | 0.0000  | 0.0000 | 0.00    | Past Infection     | M | SYR | 1981 | 34 |
| <b>561</b> | 71.1  | 12.1180 | 0.0170 | 1211.80 | Reactive Infection | M | EGY | 1972 | 43 |
| <b>562</b> | 45.2  | 8.1300  | 0.0180 | 813.00  | Past Infection     | M | IND | 1985 | 30 |
| <b>563</b> | 62.9  | 0.0000  | 0.0000 | 0.00    | Past Infection     | M | PAK | 1973 | 42 |
| <b>564</b> | 65.2  | 3.6200  | 0.0056 | 362.00  | Past Infection     | M | QAT | 1971 | 44 |
| <b>565</b> | 75.6  | 3.9030  | 0.0052 | 390.30  | Past Infection     | M | EGY | 1979 | 36 |
| <b>566</b> | 79.5  | 0.0000  | 0.0000 | 0.00    | Past Infection     | M | EGY | 1978 | 37 |
| <b>567</b> | 79.4  | 1.1400  | 0.0014 | 114.00  | Past Infection     | M | BAN | 1966 | 49 |
| <b>568</b> | 119.3 | 0.0000  | 0.0000 | 0.00    | Past Infection     | M | EGY | 1983 | 32 |

|            |       |         |        |         |                    |   |     |      |    |
|------------|-------|---------|--------|---------|--------------------|---|-----|------|----|
| <b>569</b> | 88    | 2.8000  | 0.0032 | 280.00  | Past Infection     | M | QAT | 1971 | 44 |
| <b>570</b> | 113.6 | 2.2600  | 0.0020 | 226.00  | Past Infection     | M | EGY | 1972 | 43 |
| <b>571</b> | 62.6  | 1.2300  | 0.0020 | 123.00  | Recent Active      | M | QAT | 1992 | 23 |
| <b>572</b> | 82.5  | 18.2600 | 0.0221 | 1826.00 | Past Infection     | M | QAT | 1973 | 42 |
| <b>573</b> | 64.5  | 0.0000  | 0.0000 | 0.00    | Past Infection     | M | PAL | 1984 | 31 |
| <b>574</b> | 68.8  | 1.3360  | 0.0019 | 133.60  | Past Infection     | M | SYR | 1989 | 26 |
| <b>575</b> | 56.3  | 15.0530 | 0.0267 | 1505.30 | Past Infection     | M | SYR | 1989 | 26 |
| <b>576</b> | 53.4  | 0.0000  | 0.0000 | 0.00    | Past Infection     | M | EGY | 1972 | 43 |
| <b>577</b> | 58.1  | 3.6000  | 0.0062 | 360.00  | Past Infection     | M | QAT | 1953 | 62 |
| <b>578</b> | 58.6  | 0.0000  | 0.0000 | 0.00    | Past Infection     | M | EGY | 1980 | 35 |
| <b>579</b> | 58.6  | 0.0000  | 0.0000 | 0.00    | Past Infection     | M | EGY | 1981 | 34 |
| <b>580</b> | 49.2  | 1.1010  | 0.0022 | 110.10  | Reactive Infection | M | UK  | 1955 | 60 |
| <b>581</b> | 91.5  | 1.2650  | 0.0014 | 126.50  | Past Infection     | M | SYR | 1987 | 28 |
| <b>582</b> | 83.7  | 0.0000  | 0.0000 | 0.00    | Past Infection     | M | IND | 1984 | 31 |
| <b>583</b> | 78.2  | 12.8200 | 0.0164 | 1282.00 | Past Infection     | M | SYR | 1981 | 34 |
| <b>584</b> | 85.5  | 7.0990  | 0.0083 | 709.90  | Past Infection     | M | SYR | 1978 | 37 |
| <b>585</b> | 147   | 0.0000  | 0.0000 | 0.00    | Past Infection     | M | IND | 1991 | 24 |
| <b>586</b> | 73.9  | 71.1750 | 0.0963 | 7117.50 | Past Infection     | M | SYR | 1976 | 39 |
| <b>587</b> | 98.7  | 2.8300  | 0.0029 | 283.00  | Past Infection     | M | IND | 1981 | 34 |
| <b>588</b> | 102.2 | 0.0000  | 0.0000 | 0.00    | Past Infection     | M | IND | 1985 | 30 |
| <b>589</b> | 111.8 | 6.6400  | 0.0059 | 664.00  | Past Infection     | M | MOR | 1973 | 42 |
| <b>591</b> | 107   | 4.4890  | 0.0042 | 448.90  | Past Infection     | M | BAN | 1981 | 34 |
| <b>592</b> | 83.8  | 1.2700  | 0.0015 | 127.00  | Past Infection     | M | EGY | 1980 | 35 |
| <b>593</b> | 105.9 | 1.1810  | 0.0011 | 118.10  | Past Infection     | M | SYR | 1988 | 27 |
| <b>594</b> | 107.9 | 1.3300  | 0.0012 | 133.00  | Past Infection     | M | QAT | 1983 | 32 |
| <b>595</b> | 99.3  | 25.8000 | 0.0260 | 2580.00 | Past Infection     | M | EGY | 1954 | 61 |
| <b>596</b> | 58.6  | 0.0000  | 0.0000 | 0.00    | Past Infection     | M | QAT | 1995 | 20 |
| <b>597</b> | 56.1  | 1.2300  | 0.0022 | 123.00  | Past Infection     | M | IND | 1989 | 26 |
| <b>598</b> | 60.4  | 0.0000  | 0.0000 | 0.00    | Past Infection     | M | IND | 1983 | 32 |
| <b>599</b> | 109.1 | 1.3110  | 0.0012 | 131.10  | Past Infection     | M | QAT | 1982 | 33 |

|            |       |          |        |          |                    |   |     |      |    |
|------------|-------|----------|--------|----------|--------------------|---|-----|------|----|
| <b>600</b> | 73.2  | 1.4900   | 0.0020 | 149.00   | Past Infection     | M | PAL | 1982 | 33 |
| <b>601</b> | 104.2 | 12.6430  | 0.0121 | 1264.30  | Past Infection     | M | EGY | 1985 | 30 |
| <b>602</b> | 59.4  | 0.0000   | 0.0000 | 0.00     | No Infection       | M | SYR | 1977 | 38 |
| <b>603</b> | 74.1  | 2.2560   | 0.0030 | 225.60   | Past Infection     | M | PHI | 1975 | 40 |
| <b>604</b> | 59.2  | 517.1000 | 0.8735 | 51710.00 | Past Infection     | M | QAT | 1975 | 40 |
| <b>605</b> | 72.2  | 0.0000   | 0.0000 | 0.00     | Past Infection     | M | PAL | 1959 | 56 |
| <b>607</b> | 111.3 | 33.8200  | 0.0304 | 3382.00  | Past Infection     | M | QAT | 1975 | 40 |
| <b>608</b> | 103.8 | 0.0000   | 0.0000 | 0.00     | Past Infection     | M | EGY | 1981 | 34 |
| <b>609</b> | 121.1 | 0.0000   | 0.0000 | 0.00     | Past Infection     | M | PAK | 1976 | 39 |
| <b>610</b> | 63.5  | 0.0000   | 0.0000 | 0.00     | Early Infection    | F | MOR | 1977 | 38 |
| <b>611</b> | 82.6  | 9.4830   | 0.0115 | 948.30   | Past Infection     | M | SYR | 1982 | 33 |
| <b>612</b> | 109   | 0.0000   | 0.0000 | 0.00     | Past Infection     | M | BAN | 1982 | 33 |
| <b>613</b> | 106   | 1.1300   | 0.0011 | 113.00   | Past Infection     | M | PHI | 1969 | 46 |
| <b>614</b> | 67.1  | 2.3000   | 0.0034 | 230.00   | Past Infection     | M | SYR | 1981 | 34 |
| <b>615</b> | 111.8 | 0.0000   | 0.0000 | 0.00     | Past Infection     | M | SOM | 1993 | 22 |
| <b>616</b> | 73.6  | 0.0000   | 0.0000 | 0.00     | Reactive Infection | M | QAT | 1996 | 19 |
| <b>617</b> | 118.4 | 0.0000   | 0.0000 | 0.00     | Past Infection     | M | JOR | 1979 | 36 |
| <b>619</b> | 84.8  | 0.0000   | 0.0000 | 0.00     | Past Infection     | M | QAT | 1987 | 28 |
| <b>620</b> | 71    | 0.0000   | 0.0000 | 0.00     | Past Infection     | M | QAT | 1973 | 42 |
| <b>641</b> | 74.9  | 9.5666   | 0.0128 | 956.66   | Past Infection     | M | QAT | 1979 | 36 |
| <b>642</b> | 74.1  | 1.4972   | 0.0020 | 149.72   | Past Infection     | M | QAT | 1977 | 38 |
| <b>643</b> | 73.4  | 2.2577   | 0.0031 | 225.77   | Past Infection     | M | QAT | 1975 | 40 |
| <b>644</b> | 37.3  | 20.5161  | 0.0550 | 2051.61  | Past Infection     | M | QAT | 1985 | 30 |
| <b>645</b> | 89.5  | 44.8723  | 0.0501 | 4487.23  | Early Infection    | M | QAT | 1993 | 22 |
| <b>646</b> | 85.2  | 0.0000   | 0.0000 | 0.00     | Past Infection     | M | QAT | 1981 | 34 |
| <b>647</b> | 68.9  | 0.0000   | 0.0000 | 0.00     | Past Infection     | M | QAT | 1970 | 45 |
| <b>648</b> | 45.4  | 0.0000   | 0.0000 | 0.00     | No Infection       | M | QAT | 1989 | 26 |
| <b>649</b> | 108.5 | 59.7680  | 0.0551 | 5976.80  | Past Infection     | M | QAT | 1954 | 61 |
| <b>650</b> | 88.8  | 1.3560   | 0.0015 | 135.60   | Past Infection     | M | QAT | 1962 | 53 |
| <b>651</b> | 38.7  | 14.2760  | 0.0369 | 1427.60  | Past Infection     | M | QAT | 1963 | 52 |

|            |       |          |        |          |                    |   |     |      |    |
|------------|-------|----------|--------|----------|--------------------|---|-----|------|----|
| <b>652</b> | 61.7  | 0.0000   | 0.0000 | 0.00     | Past Infection     | M | QAT | 1981 | 34 |
| <b>653</b> | 42.8  | 1.4182   | 0.0033 | 141.82   | Past Infection     | M | QAT | 1959 | 56 |
| <b>711</b> | 40.5  | 0.0000   | 0.0000 | 0.00     | Past Infection     | M | QAT | 1988 | 27 |
| <b>712</b> | 30.4  | 0.0000   | 0.0000 | 0.00     | No Infection       | M | QAT | 1980 | 35 |
| <b>713</b> | 51.6  | 0.0000   | 0.0000 | 0.00     | Past Infection     | M | QAT | 1979 | 36 |
| <b>714</b> | 90.9  | 0.0000   | 0.0000 | 0.00     | Past Infection     | M | QAT | 1980 | 35 |
| <b>715</b> | 54.2  | 11.8141  | 0.0218 | 1181.41  | Past Infection     | M | QAT | 1986 | 29 |
| <b>716</b> | 41.9  | 0.0000   | 0.0000 | 0.00     | Past Infection     | M | QAT | 1990 | 25 |
| <b>717</b> | 68.5  | 54.3172  | 0.0793 | 5431.72  | Past Infection     | M | QAT | 1983 | 32 |
| <b>718</b> | 66.9  | 0.0000   | 0.0000 | 0.00     | Past Infection     | M | QAT | 1989 | 26 |
| <b>719</b> | 59.3  | 0.0000   | 0.0000 | 0.00     | Past Infection     | M | QAT | 1989 | 26 |
| <b>720</b> | 39.9  | 10.7904  | 0.0270 | 1079.04  | Past Infection     | M | QAT | 1973 | 42 |
| <b>721</b> | 65.5  | 0.0000   | 0.0000 | 0.00     | Past Infection     | M | QAT | 1989 | 26 |
| <b>722</b> | 81.6  | 14.4965  | 0.0178 | 1449.65  | Past Infection     | M | QAT | 1970 | 45 |
| <b>723</b> | 68.3  | 0.0000   | 0.0000 | 0.00     | Past Infection     | M | QAT | 1982 | 33 |
| <b>724</b> | 45.1  | 0.0000   | 0.0000 | 0.00     | Past Infection     | M | QAT | 1972 | 43 |
| <b>725</b> | 58    | 109.8341 | 0.1894 | 10983.41 | Past Infection     | M | QAT | 1976 | 39 |
| <b>726</b> | 67.4  | 66.1056  | 0.0981 | 6610.56  | Past Infection     | M | QAT | 1976 | 39 |
| <b>727</b> | 72.4  | 2.8310   | 0.0039 | 283.10   | Reactive Infection | M | QAT | 1984 | 31 |
| <b>728</b> | 65.1  | 0.0000   | 0.0000 | 0.00     | Past Infection     | M | QAT | 1974 | 41 |
| <b>752</b> | 65.5  | 0.0000   | 0.0000 | 0.00     | Past Infection     | M | QAT | 1974 | 41 |
| <b>753</b> | 86.2  | 3.8693   | 0.0045 | 386.93   | Past Infection     | M | QAT | 1975 | 40 |
| <b>754</b> | 92.3  | 0.0000   | 0.0000 | 0.00     | Past Infection     | M | QAT | 1991 | 24 |
| <b>755</b> | 116.6 | 0.0000   | 0.0000 | 0.00     | Past Infection     | M | QAT | 1982 | 33 |
| <b>756</b> | 170.2 | 3.0025   | 0.0018 | 300.25   | Past Infection     | M | QAT | 1978 | 37 |
| <b>757</b> | 87.7  | 3.7985   | 0.0043 | 379.85   | Reactive Infection | M | QAT | 1952 | 63 |
| <b>758</b> | 144.6 | 78.1298  | 0.0540 | 7812.98  | Past Infection     | M | QAT | 1989 | 26 |
| <b>759</b> | 737.7 | 1.7477   | 0.0002 | 174.77   | Past Infection     | M | QAT | 1996 | 19 |
| <b>818</b> | 90.4  | 84.9637  | 0.0940 | 8496.37  | Past Infection     | M | QAT | 1959 | 56 |
| <b>819</b> | 87    | 6.1233   | 0.0070 | 612.33   | Past Infection     | M | QAT | 1982 | 33 |

|            |       |         |        |         |                    |   |     |      |    |
|------------|-------|---------|--------|---------|--------------------|---|-----|------|----|
| <b>893</b> | 82.9  | 0.0000  | 0.0000 | 0.00    | Past Infection     | M | QAT | 1992 | 23 |
| <b>894</b> | 95.8  | 0.0000  | 0.0000 | 0.00    | Past Infection     | M | QAT | 1970 | 45 |
| <b>895</b> | 70.9  | 1.3520  | 0.0019 | 135.20  | Past Infection     | M | QAT | 1974 | 41 |
| <b>896</b> | 94    | 0.0000  | 0.0000 | 0.00    | Past Infection     | M | QAT | 1979 | 36 |
| <b>897</b> | 65.4  | 4.1190  | 0.0063 | 411.90  | Past Infection     | M | QAT | 1981 | 34 |
| <b>898</b> | 52.7  | 1.1950  | 0.0023 | 119.50  | Reactive Infection | M | QAT | 1969 | 46 |
| <b>899</b> | 83.3  | 0.0000  | 0.0000 | 0.00    | Past Infection     | M | QAT | 1982 | 33 |
| <b>900</b> | 52.5  | 12.9849 | 0.0247 | 1298.49 | Past Infection     | M | QAT | 1979 | 36 |
| <b>901</b> | 91.9  | 2.6537  | 0.0029 | 265.37  | Reactive Infection | F | QAT | 1974 | 41 |
| <b>902</b> | 76.7  | 0.0000  | 0.0000 | 0.00    | Reactive Infection | M | QAT | 1988 | 27 |
| <b>903</b> | 137.5 | 33.8404 | 0.0246 | 3384.04 | Past Infection     | M | QAT | 1969 | 46 |
| <b>904</b> | 120.7 | 2.5640  | 0.0021 | 256.40  | Reactive Infection | M | QAT | 1993 | 22 |
| <b>918</b> | 58.2  | 16.0455 | 0.0276 | 1604.55 | Past Infection     | M | QAT | 1965 | 50 |
| <b>919</b> | 96.5  | 4.0851  | 0.0042 | 408.51  | Past Infection     | M | QAT | 1964 | 51 |
| <b>920</b> | 32.3  | 1.5380  | 0.0048 | 153.80  | Past Infection     | M | QAT | 1970 | 45 |
| <b>921</b> | 79.3  | 2.3263  | 0.0029 | 232.63  | Past Infection     | M | QAT | 1984 | 31 |
| <b>922</b> | 67.1  | 1.4247  | 0.0021 | 142.47  | Past Infection     | M | QAT | 1985 | 30 |
| <b>923</b> | 84.1  | 29.2655 | 0.0348 | 2926.55 | Reactive Infection | M | QAT | 1982 | 33 |
| <b>924</b> | 43.3  | 2.4548  | 0.0057 | 245.48  | Reactive Infection | M | QAT | 1971 | 44 |
| <b>957</b> | 35.6  | 0.0000  | 0.0000 | 0.00    | Past Infection     | M | QAT | 1988 | 27 |
| <b>958</b> | 41.8  | 6.4357  | 0.0154 | 643.57  | Past Infection     | M | QAT | 1986 | 29 |
| <b>961</b> | 37.9  | 2.3727  | 0.0063 | 237.27  | Past Infection     | M | QAT | 1979 | 36 |
| <b>962</b> | 22.5  | 1.4463  | 0.0064 | 144.63  | Past Infection     | M | QAT | 1991 | 24 |
| <b>963</b> | 29.7  | 2.7850  | 0.0094 | 278.50  | Reactive Infection | M | QAT | 1976 | 39 |
| <b>964</b> | 26.6  | 0.0000  | 0.0000 | 0.00    | Past Infection     | M | QAT | 1958 | 57 |
| <b>965</b> | 45.1  | 7.5952  | 0.0168 | 759.52  | Past Infection     | M | QAT | 1969 | 46 |
| <b>966</b> | 61.2  | 0.0000  | 0.0000 | 0.00    | Past Infection     | M | QAT | 1987 | 28 |
| <b>967</b> | 31.5  | 1.4186  | 0.0045 | 141.86  | Past Infection     | M | QAT | 1966 | 49 |
| <b>968</b> | 37.7  | 0.0000  | 0.0000 | 0.00    | Past Infection     | M | QAT | 1967 | 48 |
| <b>969</b> | 33.1  | 1.3830  | 0.0042 | 138.30  | Past Infection     | M | QAT | 1982 | 33 |

|             |       |         |        |         |                    |   |     |      |    |
|-------------|-------|---------|--------|---------|--------------------|---|-----|------|----|
| <b>970</b>  | 23.6  | 8.1771  | 0.0346 | 817.71  | Past Infection     | M | QAT | 1985 | 30 |
| <b>971</b>  | 58.1  | 65.3502 | 0.1125 | 6535.02 | Past Infection     | M | QAT | 1974 | 41 |
| <b>1010</b> | 27.5  | 0.0000  | 0.0000 | 0.00    | Past Infection     | M | QAT | 1964 | 51 |
| <b>1011</b> | 106.5 | 11.8913 | 0.0112 | 1189.13 | Past Infection     | M | QAT | 1984 | 31 |
| <b>1012</b> | 54.8  | 6.5670  | 0.0120 | 656.70  | Past Infection     | M | QAT | 1959 | 56 |
| <b>1013</b> | 41.1  | 0.0000  | 0.0000 | 0.00    | Past Infection     | M | QAT | 1989 | 26 |
| <b>1015</b> | 32.3  | 12.6179 | 0.0391 | 1261.79 | Past Infection     | M | QAT | 1979 | 36 |
| <b>1016</b> | 45.7  | 0.0000  | 0.0000 | 0.00    | Past Infection     | M | QAT | 1972 | 43 |
| <b>1017</b> | 32.9  | 12.3957 | 0.0377 | 1239.57 | Past Infection     | M | QAT | 1974 | 41 |
| <b>1018</b> | 38.2  | 0.9280  | 0.0024 | 92.80   | Reactive Infection | M | QAT | 1975 | 40 |
| <b>1019</b> | 30.6  | 0.0000  | 0.0000 | 0.00    | Past Infection     | M | QAT | 1987 | 28 |
| <b>1020</b> | 36.6  | 0.0000  | 0.0000 | 0.00    | Past Infection     | M | QAT | 1996 | 19 |
| <b>1021</b> | 58.4  | 99.8180 | 0.1709 | 9981.80 | Past Infection     | M | QAT | 1969 | 46 |
| <b>1057</b> | 45.8  | 0.0000  | 0.0000 | 0.00    | Past Infection     | M | QAT | 1971 | 44 |
| <b>1058</b> | 46.3  | 0.0000  | 0.0000 | 0.00    | Past Infection     | M | QAT | 1985 | 30 |
| <b>1059</b> | 64.7  | 0.0000  | 0.0000 | 0.00    | Past Infection     | M | QAT | 1978 | 37 |
| <b>1060</b> | 60.4  | 4.8660  | 0.0081 | 486.60  | Past Infection     | M | QAT | 1970 | 45 |
| <b>1061</b> | 93.7  | 3.6160  | 0.0039 | 361.60  | Past Infection     | M | QAT | 1968 | 47 |
| <b>1099</b> | 29.9  | 0.0000  | 0.0000 | 0.00    | No Infection       | M | QAT | 1982 | 33 |
| <b>1100</b> | 46.1  | 34.5690 | 0.0750 | 3456.90 | Past Infection     | M | QAT | 1982 | 33 |
| <b>1112</b> | 78.1  | 4.7410  | 0.0061 | 474.10  | Past Infection     | M | QAT | 1974 | 41 |
| <b>1113</b> | 46    | 2.4040  | 0.0052 | 240.40  | Past Infection     | M | QAT | 1976 | 39 |
| <b>1114</b> | 51.9  | 7.3060  | 0.0141 | 730.60  | Past Infection     | M | QAT | 1969 | 46 |
| <b>1115</b> | 44.1  | 0.0000  | 0.0000 | 0.00    | Past Infection     | M | QAT | 1975 | 40 |
| <b>1116</b> | 56.5  | 4.8660  | 0.0086 | 486.60  | Past Infection     | M | QAT | 1977 | 38 |
| <b>1117</b> | 61.5  | 44.9550 | 0.0731 | 4495.50 | Past Infection     | M | QAT | 1968 | 47 |
| <b>1118</b> | 47.6  | 0.0000  | 0.0000 | 0.00    | Past Infection     | M | QAT | 1974 | 41 |
| <b>1119</b> | 48    | 0.0000  | 0.0000 | 0.00    | Past Infection     | M | QAT | 1984 | 31 |
| <b>1120</b> | 29.6  | 0.0000  | 0.0000 | 0.00    | Reactive Infection | M | QAT | 1982 | 33 |
| <b>1121</b> | 37.7  | 0.7970  | 0.0021 | 79.70   | Past Infection     | M | QAT | 1982 | 33 |

|             |      |         |        |         |                    |   |     |      |    |
|-------------|------|---------|--------|---------|--------------------|---|-----|------|----|
| <b>1122</b> | 25.3 | 17.8780 | 0.0707 | 1787.80 | Past Infection     | M | QAT | 1950 | 65 |
| <b>1123</b> | 39.4 | 0.0000  | 0.0000 | 0.00    | Past Infection     | M | QAT | 1982 | 33 |
| <b>1124</b> | 48.5 | 26.4260 | 0.0545 | 2642.60 | Reactive Infection | M | QAT | 1979 | 36 |
| <b>1125</b> | 37.6 | 0.0000  | 0.0000 | 0.00    | Past Infection     | M | QAT | 1964 | 51 |
| <b>1145</b> | 32.4 | 0.0000  | 0.0000 | 0.00    | Past Infection     | M | QAT | 1974 | 41 |
| <b>1146</b> | 73.1 | 9.6130  | 0.0132 | 961.30  | Past Infection     | M | QAT | 1969 | 46 |
| <b>1147</b> | 21.2 | 0.0000  | 0.0000 | 0.00    | Past Infection     | M | QAT | 1988 | 27 |
| <b>1149</b> | 39.6 | 9.9270  | 0.0251 | 992.70  | Reactive Infection | M | QAT | 1947 | 68 |
| <b>1179</b> | 63.9 | 3.4430  | 0.0054 | 344.30  | Past Infection     | M | QAT | 1984 | 31 |
| <b>1180</b> | 43.4 | 0.6140  | 0.0014 | 61.40   | Reactive Infection | M | QAT | 1995 | 20 |
| <b>1197</b> | 55.9 | 0.0000  | 0.0000 | 0.00    | No Infection       | M | QAT | 1996 | 19 |
| <b>1249</b> | 56.5 | 12.2210 | 0.0216 | 1222.10 | Past Infection     | M | QAT | 1977 | 38 |
| <b>1250</b> | 52.5 | 6.3440  | 0.0121 | 634.40  | Past Infection     | M | QAT | 1978 | 37 |
| <b>1251</b> | 29.2 | 1.1080  | 0.0038 | 110.80  | Past Infection     | M | QAT | 1972 | 43 |
| <b>1252</b> | 31.3 | 3.5940  | 0.0115 | 359.40  | Past Infection     | M | QAT | 1985 | 30 |
| <b>1253</b> | 47.7 | 3.7660  | 0.0079 | 376.60  | Past Infection     | M | QAT | 1973 | 42 |
| <b>1254</b> | 49.8 | 0.0000  | 0.0000 | 0.00    | Reactive Infection | M | QAT | 1970 | 45 |
| <b>1255</b> | 43.3 | 6.4300  | 0.0148 | 643.00  | Past Infection     | M | QAT | 1954 | 61 |
| <b>1256</b> | 37.7 | 0.0000  | 0.0000 | 0.00    | Past Infection     | M | QAT | 1978 | 37 |
